# Supplementary material for: Interconnected water channels and isolated hydrophobic cavities in a calixarene-based, nanoporous supramolecular architecture
Source: Royal Society of Chemistry journal article supplement (doi:10.1039/b505375g), 2005-01-01
Supplement: b505375g.pdf [file b505375g.pdf]

# Supplementary Material

for

## Interconnected Water Channels and Isolated Hydrophobic Cavities in a Calixarene-Based, Nanoporous Supramolecular Architecture\*\*

Consiglia Tedesco,<sup>a</sup> Ivano Immediata,<sup>a</sup> Luisa Gregoli,<sup>a</sup> Luigi Vitagliano,<sup>b</sup> Attilio Immirzi,<sup>a</sup> and  
Placido Neri<sup>\*,a</sup>

<sup>a</sup> *Dipartimento di Chimica, Università di Salerno, via S. Allende 43, I-84081 Baronissi (Salerno),  
Italy. Fax: (+39)089-965-296, E-mail: neri@unisa.it*

<sup>b</sup> *Istituto di Biostrutture e Bioimmagini, CNR and CIRPEB, via Mezzocannone 16, I-80134, Napoli,  
Italy.*

### Thermal analysis

DSC measurements were run on a TA 2920 calorimeter, samples of **3** (approximately 6 mg) were sealed in aluminium pans and heated at a rate of 1°C/min under purified N<sub>2</sub> flow. TGA measurements were performed on a Mettler TG50 analyzer under purified N<sub>2</sub> flow heating at 0.5 °C/min.

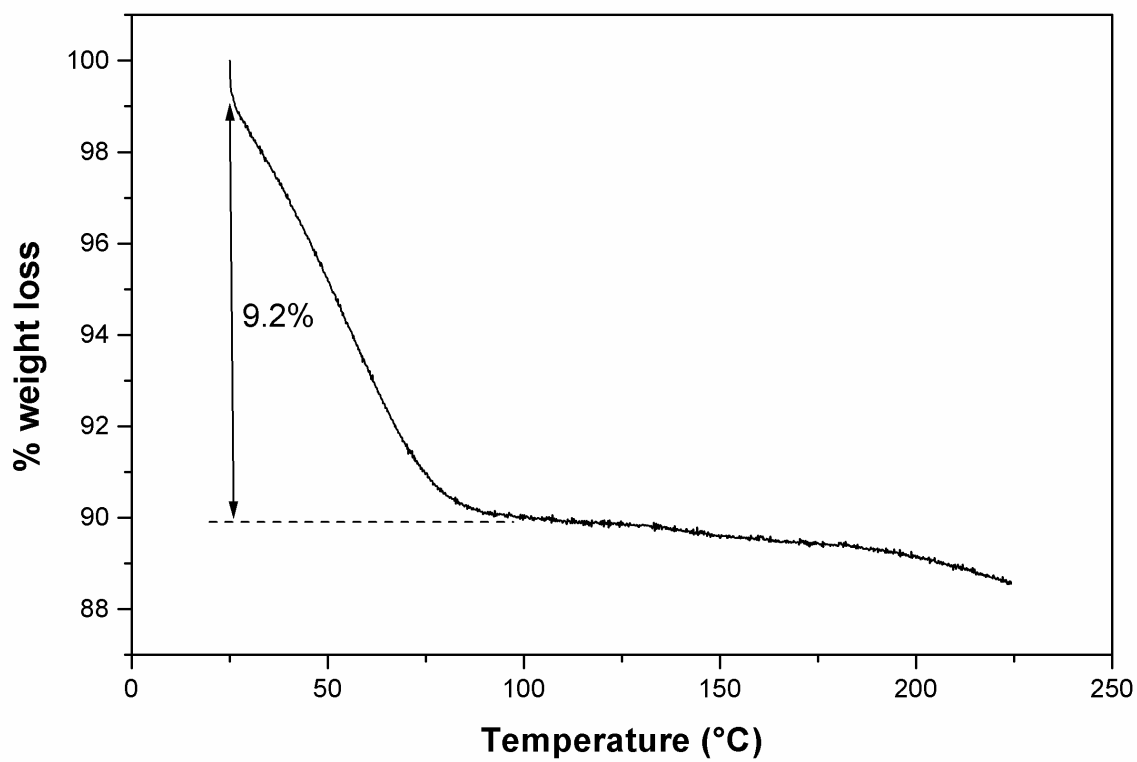

**Figure S1.** TGA curve of a crystalline sample of **3**, showing the weight loss due to the release of water from the channels (heating rate 0.5°C/min purified N<sub>2</sub> flow).

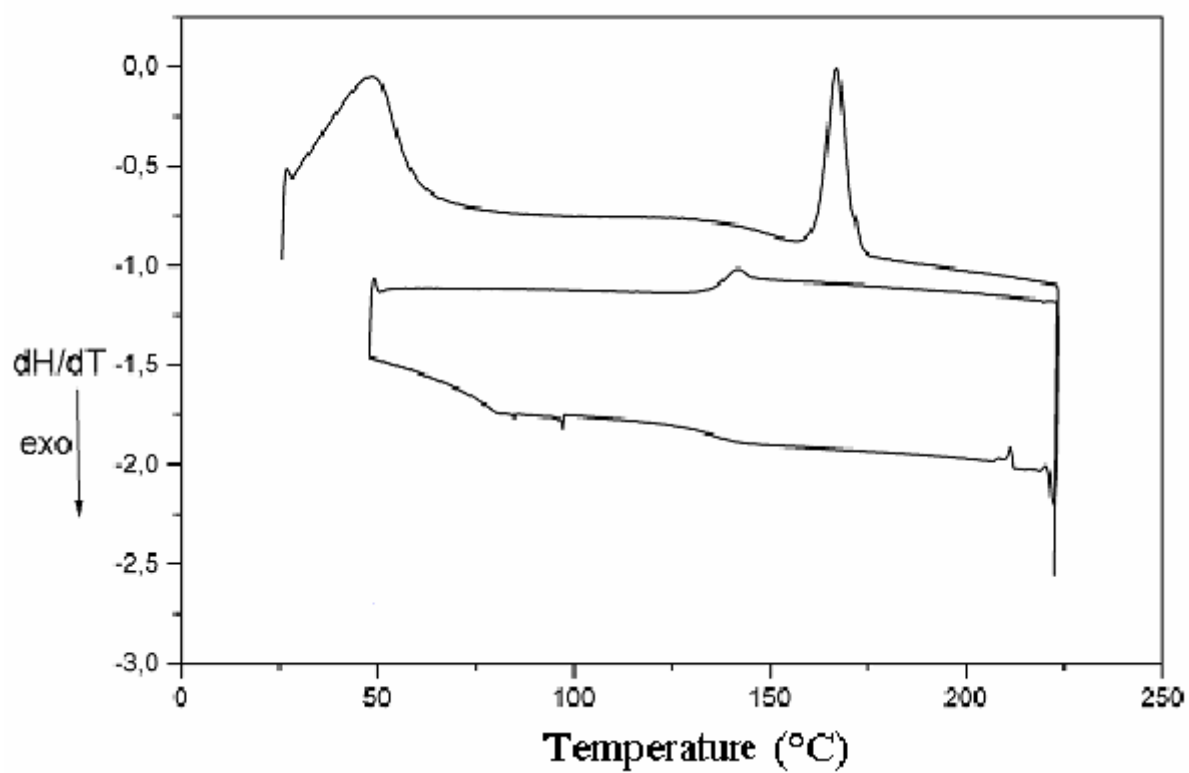

**Figure S2.** DSC profile of a sample of **3** showing the melting of the crystal.

## X-ray powder diffraction and Rietveld Analysis

Crystalline powder samples were obtained from a solution of **3** in CHCl<sub>3</sub> and ethyl acetate. 0.3 mm Lindemann capillaries were filled in air with the as prepared crystalline powder. 15 mg of crystalline powders were treated at 50°C in vacuum for 8 h and stored in a dry box under N<sub>2</sub> atmosphere. 0.3 mm Lindemann capillaries were filled with the dried samples and sealed in a dry box under nitrogen atmosphere. X-ray powder diffraction profiles have been recorded using CuK $\alpha$  radiation ( $\lambda = 1.5418 \text{ \AA}$ ) by means of a Bruker D8 diffractometer equipped with a Goebel mirror. Data reduction was performed using the program GUF1.<sup>[1]</sup> The background was modelled manually using GUF1. Rietveld refinement was accomplished with the program GSAS.<sup>[2]</sup> The peak-profile was described by a pseudo-Voigt function, in combination with a special function that accounts for the asymmetry due to axial divergence.<sup>[3]</sup> No absorption correction was applied to the data. The atomic parameters were taken from the structure model obtained from the single crystal X-ray diffraction data and were not refined. The refined lattice parameter is  $a = 36.239(2) \text{ \AA}$ . Final indices are  $R_p = 0.053$ ,  $wR_p = 0.072$ .

[1] R. E. Dinnebier, L. W. Finger, *Z. Krist. Suppl.* **1998**, *15*, 148; available at [www.fkf.mpg.de/xray/html/body\\_gufi\\_software.html](http://www.fkf.mpg.de/xray/html/body_gufi_software.html).

[2] A. C. Larson, R. B. Von Dreele, *GSAS - General Structure Analysis System*, Los Alamos National Laboratory, Los Alamos, USA, **2001**. LANL Report LAUR 86-748; available by anonymous FTP from [mist.lansce.lanl.gov](http://mist.lansce.lanl.gov).

[3] a) P. Thompson, D. E. Cox, J. B. Hastings, *J. Appl. Cryst.* **1987**, *20*, 79; b) L. W. Finger, D. E. Cox, A. P. Jephcoat, *J. Appl. Cryst.* **1994**, *27*, 892.

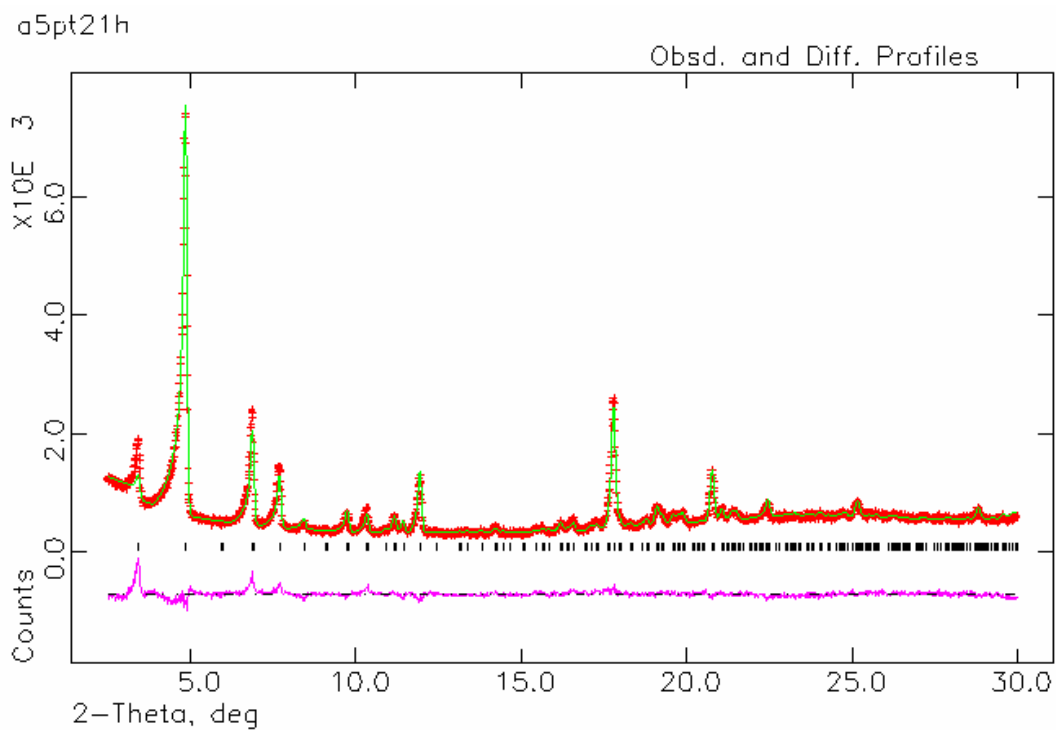

**Figure S1.** Scattered intensity of calixarene compound **3** as a function of the diffraction angle  $2\theta$ . Shown are the observed (red) and calculated X-ray powder diffraction pattern (green). The difference curve between observed and calculated profiles (magenta) and reflection markers (vertical bars).
